# Supplementary material for: Chronic environmental stress enhances tolerance to seasonal gradual warming in marine mussels
Source: PLOS journal article supplement (doi:10.1371/journal.pone.0174359), 2017-03-23
Supplement: S3 (10.1371/journal.pone.0174359.s003) [file journal.pone.0174359.s003]

**S3 Table.** Summary of Kruskal-Wallis<sup>a</sup> and one-way ANOVA<sup>b</sup> performed to analyze the effect of temperature elevation in studied biomarkers in healthy mussels (from Mundaka) and stressed mussels (from Arriluze) in fall, winter and summer.  $\chi^2$ : Chi square;  $F$ : Fisher's  $F$ ; degrees of freedom are given between brackets;  $p$ : significance. Significant effects are indicated by bold characters ( $p < 0.05$ ).

|                                                | Healthy mussel population (Mundaka) |                             |                     |                             |                      |                                | Stressed mussel population (Arriluze) |                                |                     |                             |                      |                                |
|------------------------------------------------|-------------------------------------|-----------------------------|---------------------|-----------------------------|----------------------|--------------------------------|---------------------------------------|--------------------------------|---------------------|-----------------------------|----------------------|--------------------------------|
|                                                | Fall                                |                             | Winter              |                             | Summer               |                                | Fall                                  |                                | Winter              |                             | Summer               |                                |
| <b>LP<sup>a</sup></b>                          | $\chi^2_{(4)}=17.84$                | <b><math>p=0.001</math></b> | $\chi^2_{(3)}=2.82$ | $p=0.419$                   | $\chi^2_{(4)}=15.05$ | <b><math>p&lt;0.001</math></b> | $\chi^2_{(4)}=2.52$                   | $p=0.641$                      | $\chi^2_{(4)}=9.27$ | $p=0.055$                   | $\chi^2_{(4)}=10.00$ | <b><math>p=0.040</math></b>    |
| <b>V<sub>V</sub><sub>L</sub><sup>b</sup></b>   | $F_{(4,19)}=3.89$                   | <b><math>p=0.018</math></b> | $F_{(3,9)}=2.63$    | $p=0.114$                   | $F_{(3,10)}=14.45$   | <b><math>p=0.001</math></b>    | $F_{(4,17)}=0.58$                     | $p=0.680$                      | $F_{(4,14)}=1.28$   | $p=0.329$                   | $F_{(4,15)}=0.41$    | $p=0.797$                      |
| <b>S/V<sub>L</sub><sup>a</sup></b>             | $\chi^2_{(4)}=4.24$                 | $p=0.374$                   | $\chi^2_{(3)}=3.28$ | $p=0.351$                   | $\chi^2_{(3)}=10.88$ | <b><math>p=0.012</math></b>    | $\chi^2_{(4)}=2.69$                   | $p=0.610$                      | $\chi^2_{(4)}=1.19$ | $p=0.880$                   | $\chi^2_{(4)}=2.82$  | $p=0.588$                      |
| <b>N<sub>V</sub><sub>L</sub><sup>a</sup></b>   | $\chi^2_{(4)}=11.13$                | <b><math>p=0.025</math></b> | $\chi^2_{(3)}=6.01$ | $p=0.111$                   | $\chi^2_{(3)}=4.36$  | $p=0.225$                      | $\chi^2_{(4)}=13.32$                  | <b><math>p=0.010</math></b>    | $\chi^2_{(4)}=8.76$ | $p=0.067$                   | $\chi^2_{(4)}=8.92$  | $p=0.063$                      |
| <b>V<sub>V</sub><sub>NL</sub><sup>a</sup></b>  | $\chi^2_{(4)}=12.71$                | <b><math>p=0.013</math></b> | $\chi^2_{(4)}=5.52$ | $p=0.238$                   | $\chi^2_{(3)}=6.32$  | $p=0.097$                      | $\chi^2_{(4)}=11.26$                  | <b><math>p=0.024</math></b>    | $\chi^2_{(4)}=2.49$ | $p=0.646$                   | $\chi^2_{(4)}=10.71$ | <b><math>p=0.030</math></b>    |
| <b>V<sub>V</sub><sub>BAS</sub><sup>b</sup></b> | $F_{(4,18)}=3.86$                   | <b><math>p=0.020</math></b> | $F_{(4,19)}=2.59$   | $p=0.070$                   | $F_{(3,16)}=8.07$    | <b><math>p=0.002</math></b>    | $F_{(4,18)}=2.74$                     | $p=0.061$                      | $F_{(4,19)}=2.22$   | $p=0.105$                   | $F_{(4,19)}=0.84$    | $p=0.516$                      |
| <b>MET<sup>b</sup></b>                         | $F_{(4,18)}=0.80$                   | $p=0.543$                   | $F_{(4,19)}=6.53$   | <b><math>p=0.002</math></b> | $F_{(3,16)}=0.80$    | $p=0.510$                      | $F_{(4,18)}=1.45$                     | $p=0.259$                      | $F_{(4,19)}=1.23$   | $p=0.332$                   | $F_{(4,19)}=1.69$    | $p=0.193$                      |
| <b>MLR<sup>b</sup></b>                         | $F_{(4,18)}=0.76$                   | $p=0.562$                   | $F_{(4,19)}=2.45$   | $p=0.082$                   | $F_{(3,16)}=0.12$    | $p=0.949$                      | $F_{(4,18)}=11.15$                    | <b><math>p&lt;0.001</math></b> | $F_{(4,19)}=4.86$   | <b><math>p=0.007</math></b> | $F_{(4,19)}=0.29$    | $p=0.882$                      |
| <b>MLR/MET<sup>b</sup></b>                     | $F_{(4,18)}=0.96$                   | $p=0.453$                   | $F_{(4,19)}=5.91$   | <b><math>p=0.003</math></b> | $F_{(3,16)}=0.37$    | $p=0.773$                      | $F_{(4,18)}=7.82$                     | <b><math>p=0.001</math></b>    | $F_{(4,19)}=2.79$   | $p=0.560$                   | $F_{(4,19)}=0.65$    | $p=0.636$                      |
| <b>CTD ratio<sup>b</sup></b>                   | $F_{(4,18)}=0.41$                   | $p=0.798$                   | $F_{(4,19)}=7.71$   | <b><math>p=0.001</math></b> | $F_{(3,16)}=1.12$    | $p=0.37$                       | $F_{(4,18)}=0.93$                     | $p=0.470$                      | $F_{(4,17)}=1.53$   | $p=0.237$                   | $F_{(4,18)}=2.76$    | $p=0.059$                      |
| <b>TAOC<sup>b</sup></b>                        | $F_{(3,14)}=4.32$                   | <b><math>p=0.024</math></b> | $F_{(3,15)}=4.05$   | <b><math>p=0.027</math></b> | $F_{(2,12)}=0.96$    | $p=0.412$                      | $F_{(3,14)}=2.44$                     | <b><math>p=0.180</math></b>    | $F_{(3,15)}=0.94$   | $p=0.448$                   | $F_{(3,15)}=1.24$    | $p=0.329$                      |
| <b>PK<sup>b</sup></b>                          | $F_{(3,15)}=0.75$                   | $p=0.542$                   | $F_{(3,15)}=0.85$   | $p=0.489$                   | $F_{(2,11)}=2.45$    | $p=0.131$                      | $F_{(3,15)}=1.17$                     | $p=0.354$                      | $F_{(3,14)}=3.07$   | $p=0.063$                   | $F_{(3,16)}=1.09$    | $p=0.381$                      |
| <b>PEPCK<sup>b</sup></b>                       | $F_{(3,14)}=3.65$                   | <b><math>p=0.039</math></b> | $F_{(3,14)}=5.22$   | <b><math>p=0.013</math></b> | $F_{(2,11)}=2.91$    | $p=0.097$                      | $F_{(3,16)}=1.74$                     | $p=0.200$                      | $F_{(3,14)}=3.1$    | $p=0.061$                   | $F_{(3,15)}=12.48$   | <b><math>p&lt;0.001</math></b> |
| <b>PK/PEPCK<sup>b</sup></b>                    | $F_{(3,15)}=4.14$                   | <b><math>p=0.025</math></b> | $F_{(3,13)}=7.05$   | <b><math>p=0.005</math></b> | $F_{(2,10)}=22.71$   | <b><math>p&lt;0.001</math></b> | $F_{(3,15)}=1.15$                     | $p=0.362$                      | $F_{(3,15)}=1.01$   | $p=0.415$                   | $F_{(3,15)}=2.87$    | $p=0.071$                      |
| <b>COX<sup>b</sup></b>                         | $F_{(3,14)}=1.90$                   | $p=0.177$                   | $F_{(3,14)}=0.26$   | $p=0.853$                   | $F_{(2,10)}=3.30$    | $p=0.079$                      | $F_{(3,15)}=3.30$                     | $p=0.059$                      | $F_{(3,13)}=0.82$   | $p=0.506$                   | $F_{(3,14)}=3.89$    | <b><math>p=0.032</math></b>    |
| <b>HK<sup>b</sup></b>                          | $F_{(3,14)}=1.84$                   | $p=0.186$                   | $F_{(3,15)}=2.06$   | $p=0.149$                   | $F_{(2,11)}=0.12$    | $p=0.891$                      | $F_{(3,15)}=0.89$                     | $p=0.467$                      | $F_{(3,13)}=5.23$   | <b><math>p=0.014</math></b> | $F_{(3,14)}=4.46$    | <b><math>p=0.021</math></b>    |
| <b>GP<sup>b</sup></b>                          | $F_{(3,12)}=0.45$                   | $p=0.720$                   | $F_{(3,14)}=1.30$   | $p=0.313$                   | $F_{(2,10)}=3.47$    | $p=0.072$                      | $F_{(3,14)}=3.62$                     | <b><math>p=0.040</math></b>    | $F_{(3,16)}=0.04$   | $p=0.991$                   | $F_{(3,14)}=2.74$    | $p=0.083$                      |
